# Supplementary material
Source: PubMed Central journal article supplement (PMC7814474)
Supplement: pnas.2018015118.sapp.pdf [file pnas.2018015118.sapp.pdf]

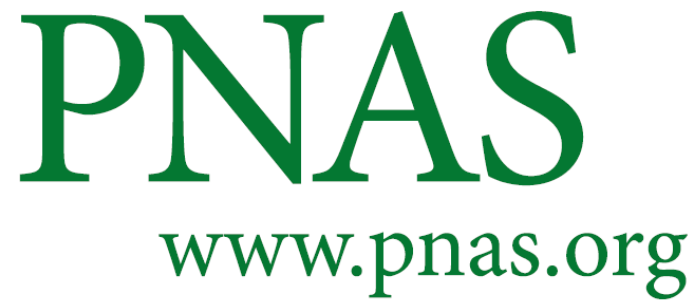

## Supplementary Information for

Minimal gene set from *Sinorhizobium (Ensifer) meliloti* pSymA required for efficient symbiosis with *Medicago*

Barney A. Geddes, Jason Kearsley, Jiarui Huang, Maryam Zamani, Zahed Muhammed, Leah Sather, Aakanx Panchal, George C. diCenzo, and Turlough M. Finan.

Turlough M. Finan  
**Email:** finan@mcmaster.ca

### This PDF file includes:

Tables S1 to S3  
Figures S1 to S6  
SI References

**Table S1.** Summary of symbiotic data for major checkpoints of *S. meliloti* pSymA genome reduction.

| Strain               | Description                  | <i>Medicago sativa</i> |               |                          |                      | <i>Medicago truncatula</i> |               |                          | <i>Melilotus officinalis</i> |               |                          |
|----------------------|------------------------------|------------------------|---------------|--------------------------|----------------------|----------------------------|---------------|--------------------------|------------------------------|---------------|--------------------------|
|                      |                              | Shoot dry weight (mg)  | Nodule number | Nodule fresh weight (mg) | Acetylene reduction* | Shoot dry weight           | Nodule number | Nodule fresh weight (mg) | Shoot dry weight             | Nodule number | Nodule fresh weight (mg) |
| RmP110               | Wildtype                     | 64.7 (12.5)            | 5.0 (0.6)     | 3.7 (0.7)                | +<br>1859 (240)      | 34.4 (2.4)                 | 8.9 (2.0)     | 1.4 (0.3)                | 82.8 (22.5)                  | 8.3 (2.2)     | 5.9 (1.0)                |
| RmP4253              | $\Delta$ pSymA               | 8.4 (0.9)              | 0             | 0                        | -                    | 13.0 (2.0)                 | 0             | 0                        | 2.9 (0.9)                    | 0             | 0                        |
| RmP4291              | $\Delta$ pSymA<br>minSymA1.0 | 72.3 (28.9)            | 8.3 (0.7)     | 4.5 (1.2)                | +<br>2350 (410)      | 36.8 (9.1)                 | 7.8 (1.3)     | 1.6 (0.4)                | 58.3 (23.0)                  | 9.2 (1.0)     | 3.9 (1.1)                |
| RmP4600              | $\Delta$ pSymA<br>minSymA2.1 | 60.6 (10.9)            | 14.8 (3.7)    | 1.5 (0.4)                | +<br>2473 (1153)     | 27.9 (4.1)                 | 13.2 (0.8)    | 0.8 (0.4)                | 81.2 (21.6)                  | 10.7 (1.8)    | 3.6 (0.7)                |
| RmP4663              | $\Delta$ pSymA<br>minSymA3.2 | 35.3 (5.7)             | 8.1 (4.3)     | 2.2 (0.6)                | +<br>1574 (822)      | 24.6 (2.6)                 | 5.7 (1.5)     | 2.3 (1.6)                | 68.1 (14.9)                  | 8.4 (1.6)     | 5.2 (0.9)                |
| RmP4621              | $\Delta$ pSymA<br>minSymA3.3 | 41.6 (5.8)             | ND            | ND                       | +<br>696 (192)       | 16.6 (3.0)                 | ND            | ND                       | 56.6 (20.1)                  | ND            | ND                       |
| Uninoculated control |                              | 7.6 (2.1)              | 0             | 0                        | -                    | 11.4 (1.2)                 | 0             | 0                        | 3.3 (1.0)                    | 0             | 0                        |

\* The detection of ethylene production by acetylene reduction assay is indicated as + (detected ethylene production) or - (ethylene production was not detected). The actual values measured are included below and expressed as nmoles ethylene produced hour<sup>-1</sup> plant<sup>-1</sup>.

Data are from 3 independent replicates (pots) with 6 plants per pot (*M. sativa*) and 4 plants per pot (*M. truncatula* and *M. officinalis*) and were collected 31 days post inoculation. Shoot dry weight and nodule number are calculated per plant, and nodule fresh weight is calculated from average fresh weight per nodule. Values in parentheses indicate standard deviation of the mean. ND indicates no data collected.

**Table S2.** Strains and plasmids used in this study

| Strain                        | Description                                                                                                                                     | Reference                    |
|-------------------------------|-------------------------------------------------------------------------------------------------------------------------------------------------|------------------------------|
| <i>Sinorhizobium meliloti</i> |                                                                                                                                                 |                              |
| Rm1021                        | SU47 <i>str-21</i> ; Sm <sup>R</sup>                                                                                                            | Meade et al. 1982            |
| RmG340                        | Rm1021 <i>phe32:Tn5-233</i>                                                                                                                     | Oresnik et al. 1994          |
| RmP110                        | Wildtype, Rm1021 with wild type <i>pstC</i> ; Sm <sup>R</sup>                                                                                   | Yuan et al. 2006             |
| RmP991                        | RmP110, ΔA116 (pSymA nt. 313,654-458,916) (pTH1944); Sm <sup>R</sup> Tc <sup>R</sup>                                                            | Milunovic et al. 2014        |
| RmP938                        | RmP110 with pTH1522 (nt 400,267–402,136), pTH1937 (nt 458,916-459,668) integrated in pSymA ; Sm <sup>R</sup> Nm <sup>R*</sup> Gm <sup>R</sup>   | Milunovic et al. 2014        |
| RmP939                        | RmP110, ΔA117 (pSymA nt. 402,136-458,916) (pTH1944); Sm <sup>R</sup> Tc <sup>R</sup>                                                            | Milunovic et al. 2014        |
| RmP941                        | RmP110, ΔA118 (pSymA nt. 459,668-505,335) (pTH1944); Sm <sup>R</sup> Nm <sup>R</sup> Gm <sup>R</sup> Tc <sup>R</sup>                            | Milunovic et al. 2014        |
| RmP946                        | RmP110 with pTH1522 (nt 623673–624863), pTH1937 (nt 677,157-678,150) integrated in pSymA; Sm <sup>R</sup> Nm <sup>R</sup> Gm <sup>R</sup>       | Milunovic et al. 2014        |
| RmP947                        | RmP110, ΔA121 (pSymA nt. 624,863-677,157) (pTH1944); Sm <sup>R</sup> Tc <sup>R</sup>                                                            | Milunovic et al. 2014        |
| RmP1615                       | <i>metH::Tn5</i> ; methionine auxotroph                                                                                                         | Laboratory collection        |
| RmP1685                       | RmP110 Ω <i>attB</i> Ω ΦC31 <i>int</i> ; Sm <sup>R</sup> Nm <sup>R</sup>                                                                        | diCenzo et al. 2014          |
| RmP2201                       | RmP110 <i>manB</i> (SMc04255) replaced by FRT-kan-FRT; Sm <sup>R</sup> , Nm <sup>R</sup>                                                        | Katerine Kibitkin Msc Thesis |
| RmP2227                       | RmP110 <i>manB</i> (SMc04255):FRT Sm <sup>R</sup>                                                                                               | Katerine Kibitkin Msc Thesis |
| RmP2667                       | RmP110 Ω <i>attB</i> Ω ΦC31 <i>int</i> (pTH1944); Sm <sup>R</sup> Tc <sup>R</sup>                                                               | diCenzo et al. 2013          |
| RmP2507                       | RmP110 <i>hypRE</i> :FRT- <i>kan</i> -FRT; Sm <sup>R</sup> Nm <sup>R</sup>                                                                      | White et al. 2012            |
| RmP3543                       | RmP110 ΔA301 (pSymA nt. 507,388-623,673) (pTH2505); Sm <sup>R</sup> Gm <sup>R</sup> Tc <sup>R</sup>                                             | diCenzo et al. 2016          |
| RmP4218                       | RmP3543 with pTH2505 plasmid cured; Sm <sup>R</sup> Gm <sup>R</sup>                                                                             | This work                    |
| RmP4219                       | RmP4218 with ΔA301 scar removed with pTH3237; Sm <sup>R</sup>                                                                                   | This work                    |
| RmP4247                       | RmP110 with pSymA cured, Sm <sup>R</sup>                                                                                                        | This work                    |
| RmP4250                       | RmP4247 with <i>hypRE</i> :FRT- <i>kan</i> -FRT introduced from RmP2507; Sm <sup>R</sup> Nm <sup>R</sup>                                        | This work                    |
| RmP4253                       | RmP4250 with pTH2505 introduced and <i>kan</i> cassette flipped out by Flp/FRT <i>hypRE</i> :FRT; Sm <sup>R</sup> Tc <sup>R</sup>               | This work                    |
| RmP4291                       | minSymA1.0; RmP4253 with pTH3255 integrated into <i>hypRE</i> :FRT; Sm <sup>R</sup> Gm <sup>R</sup> Nm <sup>R</sup>                             | This work                    |
| RmP4307                       | RmP4219 with pTH1522 (nt 400,267–402,136) integrated in pSymA; Sm <sup>R</sup> Gm <sup>R</sup>                                                  | This work                    |
| RmP4308                       | RmP4219 with pTH1937 (nt 677,157-678,150) integrated in pSymA; Sm <sup>R</sup> Nm <sup>R</sup>                                                  | This work                    |
| RmP4309                       | RmP4219 with pTH1522 (nt 400,267-402,136) and pTH1937 (nt 677,157-678,150) integrated in pSymA; Sm <sup>R</sup> Gm <sup>R</sup> Nm <sup>R</sup> | This work                    |
| RmP4310                       | RmP4309 carrying pTH2505; Sm <sup>R</sup> Gm <sup>R</sup> Nm <sup>R</sup> Tc <sup>R</sup>                                                       | This work                    |
| RmP4346                       | RmP4253 with pTH3278 ( <i>fix-1</i> ) integrated into <i>hypRE</i> :FRT; Sm <sup>R</sup> Nm <sup>R</sup>                                        | This work                    |
| RmP4347                       | RmP947 with pTH1944 removed by pBBRMCS5 incompatibility; Sm <sup>R</sup> Gm <sup>R</sup>                                                        | This work                    |
| RmP4371                       | minSymA2.0; RmP4253 with pTH3294 integrated into LP-B1 ( <i>hypRE</i> :FRT); Sm <sup>R</sup> Nm <sup>R</sup>                                    | This work                    |
| RmP4372                       | RmP110 with pTH3311 integrated; Sm <sup>R</sup> Nm <sup>R</sup>                                                                                 | This work                    |
| RmP4373                       | RmP110 with pTH3312 integrated; Sm <sup>R</sup> Nm <sup>R</sup>                                                                                 | This work                    |

|         |                                                                                                                         |           |
|---------|-------------------------------------------------------------------------------------------------------------------------|-----------|
| RmP4374 | RmP110 with pTH3313 integrated; Sm <sup>R</sup> Nm <sup>R</sup>                                                         | This work |
| RmP4375 | RmP110 with pTH3314 integrated; Sm <sup>R</sup> Nm <sup>R</sup>                                                         | This work |
| RmP4376 | RmP4372 with pTH3315 integrated; Sm <sup>R</sup> Gm <sup>R</sup> Nm <sup>R</sup>                                        | This work |
| RmP4377 | RmP4373 with pTH3316 integrated; Sm <sup>R</sup> Gm <sup>R</sup> Nm <sup>R</sup>                                        | This work |
| RmP4378 | RmP4374 with pTH3317 integrated; Sm <sup>R</sup> Gm <sup>R</sup> Nm <sup>R</sup>                                        | This work |
| RmP4379 | RmP4375 with pTH3318 integrated; Sm <sup>R</sup> Gm <sup>R</sup> Nm <sup>R</sup>                                        | This work |
| RmP4436 | RmP4373 with pTH3318 integrated; Sm <sup>R</sup> Gm <sup>R</sup> Nm <sup>R</sup>                                        | This work |
| RmP4437 | RMP4374 with pTH3318 integrated; Sm <sup>R</sup> Gm <sup>R</sup> Nm <sup>R</sup>                                        | This work |
| RmP4483 | ΦRmP4346 (fix-1) → RmP4347 (ΔA121); Sm <sup>R</sup> Gm <sup>R</sup> Nm <sup>R</sup>                                     | This work |
| RmP4503 | RmP110 with pTH3364 integrated; Sm <sup>R</sup> , Gm <sup>R</sup>                                                       | This work |
| RmP4504 | RmP110 with pTH3365 integrated; Sm <sup>R</sup> , Gm <sup>R</sup>                                                       | This work |
| RmP4505 | RmP4503 with <i>gusA</i> integrated and pTH3364 backbone removed via <i>sacB</i><br>Sm <sup>R</sup>                     | This work |
| RmP4506 | RmP14505 with <i>celB</i> integrated and pTH3365 backbone removed via<br><i>sacB</i> ; Sm <sup>R</sup>                  | This work |
| RmP4507 | ΦRmP340 ( <i>phe32::Tn5-233</i> ) → RmP4291; ; Sm <sup>R</sup> Gm <sup>R</sup> Nm <sup>R</sup> Sp <sup>R</sup>          | This work |
| RmP4508 | ΦRmP4505 ( <i>gusA</i> ) → RmP4507; Sm <sup>R</sup> Gm <sup>R</sup> Nm <sup>R</sup>                                     | This work |
| RmP4509 | ΦRmP4506 ( <i>celB</i> ) → RmP4507; Sm <sup>R</sup> Gm <sup>R</sup> Nm <sup>R</sup>                                     | This work |
| RmP4512 | RmP110, ΔA401 (pSymA nt 400,267-423,453) via pTH2505; Sm <sup>R</sup> , Gm <sup>R</sup>                                 | This work |
| RmP4513 | RmP110, ΔA402 (pSymA nt 423,454-465,115) via pTH2505; Sm <sup>R</sup> , Gm <sup>R</sup>                                 | This work |
| RmP4514 | RmP110, ΔA403 (pSymA nt 465,116-476,084) via pTH2505; Sm <sup>R</sup> , Gm <sup>R</sup>                                 | This work |
| RmP4515 | RmP110, ΔA404 (pSymA nt 476,085-507,338) via pTH2505; Sm <sup>R</sup> , Gm <sup>R</sup>                                 | This work |
| RmP4516 | RmP110, ΔA405 (pSymA nt 423,454-507,338) via pTH2505; Sm <sup>R</sup> , Gm <sup>R</sup>                                 | This work |
| RmP4517 | RmP110, ΔA406 (pSymA nt 465,116-507,338) via pTH2505; Sm <sup>R</sup> , Gm <sup>R</sup>                                 | This work |
| RmP4523 | ΦRmP4371 (minSymA2.0) → RmP110 (wildtype)                                                                               | This work |
| RmP4524 | ΦRmP4371 (minSymA2.0) → RmP4512 (ΔA401)                                                                                 | This work |
| RmP4525 | ΦRmP4371 (minSymA2.0) → RmP4512 (ΔA403)                                                                                 | This work |
| RmP4526 | ΦRmP4371 (minSymA2.0) → RmP4512 (ΔA403)                                                                                 | This work |
| RmP4527 | ΦRmP4371 (minSymA2.0) → RmP4512 (ΔA404)                                                                                 | This work |
| RmP4528 | ΦRmP4371 (minSymA2.0) → RmP4512 (ΔA405)                                                                                 | This work |
| RmP4529 | ΦRmP4371 (minSymA2.0) → RmP4512 (ΔA406)                                                                                 | This work |
| RmP4532 | RmP2667 with pTH3372 (fix-2) integrated into LP-C1 via <i>attB</i> ; Sm <sup>R</sup> Sp <sup>R</sup><br>Tc <sup>R</sup> | This work |
| RmP4597 | minSymA3.0; RmP4253 with pTH3375 integrated into LP-B1<br>( <i>hypRE:FRT</i> )                                          | This work |
| RmP4598 | RmP4253 with pTH3376 integrated into LP-B1 ( <i>hypRE:FRT</i> )                                                         | This work |
| RmP4599 | minSymA3.1; ΦRmP4532 (fix-2) → RmP4597 (minSymA3.0); Sm <sup>R</sup> Nm <sup>R</sup><br>Sp <sup>R</sup>                 | This work |
| RmP4600 | minSymA2.1; ΦRmP4532 (fix-2) → RmP4371 (minSymA2.0); Sm <sup>R</sup> Nm <sup>R</sup><br>Sp <sup>R</sup>                 | This work |
| RmP4608 | ΦRmP4532 → RmP4603; Sm <sup>R</sup> Nm <sup>R</sup> Sp <sup>R</sup>                                                     | This work |
| RmP4610 | ΦRmP4532 → RmP4605; Sm <sup>R</sup> Nm <sup>R</sup> Sp <sup>R</sup>                                                     | This work |
| RmP4612 | RmP1685 with pTH3373 (synth-nif) integrated into LP-C1 via <i>attB</i>                                                  | This work |
| RmP4613 | ΦRmP4612 (synth-nif) → RmP4346 (fix-1); Sm <sup>R</sup> Nm <sup>R</sup> Tc <sup>R</sup>                                 | This work |

|                                 |                                                                                                                                                                                       |                       |
|---------------------------------|---------------------------------------------------------------------------------------------------------------------------------------------------------------------------------------|-----------------------|
| RmP4614                         | ΦRmP4612 (synth-nif) → RmP4598 (synth-fix); Sm <sup>R</sup> Nm <sup>R</sup> Tc <sup>R</sup>                                                                                           | This work             |
| RmP4617                         | ΦRmP2201 ( <i>manB</i> :FRT-kan-FRT) → RmP4247 (ΔpSymA)                                                                                                                               | This work             |
| RmP4618                         | RmP2227 with pTH3371 (synth-nod) integrated into LP-C2 ( <i>manB</i> :FRT) and transduced into RmP110; Sm <sup>R</sup> Sp <sup>R</sup>                                                | This work             |
| RmP4620                         | ΦRmP4618 (synth-nod) → RmP4613(fix-1/synth-nif); Sm <sup>R</sup> Nm <sup>R</sup> Sp <sup>R</sup> Tc <sup>R</sup>                                                                      | This work             |
| RmP4621                         | ΦRmP4618 (synth-nod) → RmP4614 (synth-fix/synth-nif); Sm <sup>R</sup> Nm <sup>R</sup> Sp <sup>R</sup> Tc <sup>R</sup>                                                                 | This work             |
| RmP4624                         | ΦRmP4532 (fix-2) → RmP4512 (ΔA401); Sm <sup>R</sup> Gm <sup>R</sup> Sp <sup>R</sup>                                                                                                   | This work             |
| RmP4628                         | ΦRmP4506 ( <i>celB</i> ) → RmP4371 phe(-) (viaΦ RmG340 transduction); phe(+), Sm <sup>R</sup> Nm <sup>R</sup>                                                                         | This work             |
| RmP4629                         | ΦRmP4505 ( <i>gusA</i> ) → RmP4371 phe(-) (viaΦ RmG340 transduction) ; phe(+), Sm <sup>R</sup> Nm <sup>R</sup>                                                                        | This work             |
| RmP4645                         | ΦRmP4532 (fix-2) → RmP4627 (minSymA2.0 <i>gusA</i> ); Sm <sup>R</sup> , Nm <sup>R</sup> , Sp <sup>R</sup>                                                                             | This work             |
| RmP4646                         | ΦRmP4532 (fix-2) → RmP4628 (minSymA2.0 <i>celB</i> ); Sm <sup>R</sup> , Nm <sup>R</sup> , Sp <sup>R</sup>                                                                             | This work             |
| RmP4657                         | RmP4617 with kan cassette removed by Flp recombinase (pTH2505); Sm <sup>R</sup> , Tc <sup>R</sup>                                                                                     | This work             |
| RmP4658                         | RmP4657 with pTH3294 integrated (minSymA2.0) into <i>manB</i> :FRT (LP-C2); Sm <sup>R</sup> , Nm <sup>R</sup>                                                                         | This work             |
| RmP4661                         | RmP2667 with pTH3396 (reduced fix-2) integrated into LP-C1 via <i>attB</i> ; Sm <sup>R</sup> , Sp <sup>R</sup>                                                                        | This work             |
| RmP4663                         | minSymA3.2; ΦRmP4661 (reduced fix-2) → RmP4597 (minSymA3.0); Sm <sup>R</sup> Nm <sup>R</sup> Sp <sup>R</sup>                                                                          | This work             |
| RmP4684                         | ΦRmP4532 (fix-2) → RmP4658 (minSymA2.0:LP-C2), minSymA2.1 LP-C2; Sm <sup>R</sup> , Nm <sup>R</sup> , Sp <sup>R</sup>                                                                  | This work             |
| RmP4737                         | RmP4657 with pTH3434 (NGR234 nod) integrated into LP-C1 via <i>attB</i> ; Sm <sup>R</sup> , Sp <sup>R</sup>                                                                           | This work             |
| RmP4741                         | ΦRmP4737 (NGR234 nod) → RmP4614 (synth-nod/synth-nif); Sm <sup>R</sup> , Nm <sup>R</sup> , Sp <sup>R</sup> , Tc <sup>R</sup>                                                          | This work             |
|                                 |                                                                                                                                                                                       |                       |
| <i>Escherichia coli</i>         |                                                                                                                                                                                       |                       |
| DH5α                            | <i>endA1 hsdR17 supE44 thi-1 recA1 gyrA96 relA1 Δ(argF-lacZYA) U169 φ80dlacZΔM15</i>                                                                                                  | Invitrogen            |
| Epi300                          | F <sup>-</sup> <i>mcrA Δ(mrr-hsdRMS-mcrBC) φ80dlacZΔM15 ΔlacX74 recA1 endA1 araD139 Δ(ara, leu)7697 galU galK λ<sup>-</sup> rpsL nupG trfA dhfr</i> ; Sm <sup>R</sup> Cm <sup>R</sup> | Lucigen               |
| M928                            | Rifampicin resistant DH5α; Rf <sup>R</sup>                                                                                                                                            | Lab collection        |
| M2608                           | M928 with pTH3255; Rf <sup>R</sup> Gm <sup>R</sup> Km <sup>R</sup>                                                                                                                    | This work             |
| MT616                           | MM294A <i>recA-56</i> (pRK600), mobilizer; Cm <sup>R</sup>                                                                                                                            | Finan et al. 1986     |
| <i>Saccharomyces cerevisiae</i> |                                                                                                                                                                                       |                       |
| VL6-48                          | MATα his3-Δ200 trp1-Δ1 ura3-52 lys2 289 ade2-1 met14 cir <sup>0</sup>                                                                                                                 | ATCC® MYA-3666™       |
|                                 |                                                                                                                                                                                       |                       |
| <b>Plasmid</b>                  | <b>Description</b>                                                                                                                                                                    | <b>Reference</b>      |
| pJQ200SK                        | Suicide vector for <i>sacB</i> -mediated double homologous recombination; Gm <sup>R</sup>                                                                                             | Quandt and Hynes 1993 |
| pOGG024                         | pBBR1 Golden Gate cloning plasmid; Gm <sup>R</sup>                                                                                                                                    | Geddes et al. 2019    |
| pOGG0253                        | Rlv3841 <i>nifH</i> promoter driving <i>gusA</i> in stable RK2 plasmid; Nm <sup>R</sup>                                                                                               | Geddes et al. 2019    |
| pOGG0254                        | Rlv3841 <i>nifH</i> promoter driving <i>gusA</i> in stable RK2 plasmid; Nm <sup>R</sup>                                                                                               | Geddes et al. 2019    |

|         |                                                                                                                                                             |                          |
|---------|-------------------------------------------------------------------------------------------------------------------------------------------------------------|--------------------------|
| pJG592  | I-SceI meganuclease in pRK7813; Tc <sup>R</sup>                                                                                                             | Gift from Joel Griffiths |
| pAGE1.0 | BAC/YAC multi-host shuttle vector with <i>oriT</i> , <i>S. meliloti</i> pSymA <i>repABC</i> ; HIS3, Sp <sup>R</sup>                                         | Brumwell et al. 2019     |
| pAGE2.0 | BAC/YAC multi-host shuttle vector with <i>oriT</i> , <i>S. meliloti</i> pSymA <i>repABC</i> ; HIS3, Tc <sup>R</sup>                                         | Brumwell et al. 2019     |
| pAGE3.0 | BAC/YAC multi-host shuttle vector with <i>oriT</i> , <i>S. meliloti</i> pSymA <i>repABC</i> ; HIS3, Nm <sup>R</sup>                                         | Brumwell et al. 2019     |
| pTH1522 | Reporter vector containing a FRT site, ColE1 <i>oriV</i> ; Gm <sup>R</sup>                                                                                  | Cowie et al. 2006        |
| pTH1496 | pSymA <i>inca</i> in pOT1; Gm <sup>R</sup>                                                                                                                  | MacLellan et al. 2005    |
| pTH1937 | ΔTn903 inverted repeats, pRK2 <i>oriT</i> , <i>nptII</i> from Tn5, p15A <i>oriV</i> ; Nm <sup>R</sup>                                                       | Milunovic et al. 2014    |
| pTH1944 | <i>flp</i> gene in a pBBR-MCS3 derivative with RK2-tetR-tetA; Tc <sup>R</sup>                                                                               | Milunovic et al. 2014    |
| pTH2505 | <i>flp</i> gene controlled by protocatechuate inducible promoter in pRK7813; Tc <sup>R</sup>                                                                | Zhang et al. 2012        |
| pTH2919 | Tc <sup>R</sup> <i>sacB</i> suicide vector, derived from pJQ200mp18; Tc <sup>R</sup>                                                                        | diCenzo and Finan 2015   |
| pTH2992 | pTH1496 (pOT1 with pSymA <i>inca</i> ) with I-SceI cut site; Gm <sup>R</sup>                                                                                | Lab collection           |
| pTH2993 | pTrecSC expression vector with 3 pSymA antitoxins and I-SceI cut site; Gm <sup>R</sup>                                                                      | Lab collection           |
| pTH3237 | pTH2919 (pSymA nt 506,533-507,338 + 623,673-624,173 via XmaI/PstI); Tc <sup>R</sup>                                                                         | This work                |
| pTH3255 | A117-A118-A121 excised from pSymA of RmP4310 by Flp/FRT recombination, used to create minSymA1.0; Gm <sup>R</sup> Nm <sup>R</sup>                           | This work                |
| pTH3278 | <i>fix-1</i> locus (pSymA nt 662,568-675,117) assembled by yeast recombineering in pAGE3.0 via ClaI/I-SceI; Nm <sup>R</sup>                                 | This work                |
| pTH3291 | pTH1522 3447 bp amplicon including <i>oriV/oriT</i> , FRT site and Gm <sup>R</sup> , circularized via BglII; Gm <sup>R</sup>                                | This work                |
| pTH3294 | <i>nif-1/fix-3/syr/nif-2/nod-2/nol</i> loci (pSymA nt 441,274-464,352, 465,636-474,959, 476,839-492,522) assembled into pTH3278 via I-SceI; Nm <sup>R</sup> | This work                |
| pTH3311 | pTH1937 with pSymA nt 399,264-400,266 via KpnI/HindIII; Nm <sup>R</sup>                                                                                     | This work                |
| pTH3312 | pTH1937 with pSymA nt 422,708-423,453 via KpnI/HindIII; Nm <sup>R</sup>                                                                                     | This work                |
| pTH3313 | pTH1937 with pSymA nt 464,353-465,115 via KpnI/HindIII; Nm <sup>R</sup>                                                                                     | This work                |
| pTH3314 | pTH1937 with pSymA nt 475,233-476,084 via KpnI/HindIII; Nm <sup>R</sup>                                                                                     | This work                |
| pTH3315 | pTH3291 with pSymA nt 423,454-424,384 via BglII/PstI; Gm <sup>R</sup>                                                                                       | This work                |
| pTH3316 | pTH3291 with pSymA nt 465,116-465,812 via BglII/PstI; Gm <sup>R</sup>                                                                                       | This work                |
| pTH3317 | pTH3291 with pSymA nt 476,085-476,839 via BglII/PstI; Gm <sup>R</sup>                                                                                       | This work                |
| pTH3318 | pTH3291 with pSymA nt 507,339-508,595 via BglII/PstI; Gm <sup>R</sup>                                                                                       | This work                |
| pTH3362 | pOGG024 with chrom. nt 256,639-257,195, PnifH:: <i>gusA</i> , and chrom. nt 257,274-257,640 assembled by Golden Gate cloning via BsaI; Gm <sup>R</sup>      | This work                |
| pTH3363 | pOGG024 with chrom. nt 256,639-257,195, PnifH:: <i>celB</i> , and chrom. nt 257,274-257,640 assembled by Golden Gate cloning via BsaI; Gm <sup>R</sup>      | This work                |
| pTH3364 | Three fragment insert from pTH3362 cloned into pJQ200SK via XbaI/PstI; Gm <sup>R</sup>                                                                      | This work                |
| pTH3365 | Three fragment insert from pTH3362 cloned into pJQ200SK via XbaI/PstI; Gm <sup>R</sup>                                                                      | This work                |
| pTH3369 | pAGE1.0 with FRT and attP replacing <i>repABC</i> via ClaI/I-SceI; Sp <sup>R</sup>                                                                          | This work                |
| pTH3370 | pAGE2.0 with FRT and attP replacing <i>repABC</i> via ClaI/I-SceI; Tc <sup>R</sup>                                                                          | This work                |
| pTH3371 | <i>synth-nod</i> cluster (pSymA nt 418,096-422,417, 468,075-475,645, 477,027-                                                                               | This work                |

|         |                                                                                                                                                                                                               |           |
|---------|---------------------------------------------------------------------------------------------------------------------------------------------------------------------------------------------------------------|-----------|
|         | 482,783, 485,141-492,308) assembled by yeast recombineering into pTH3369 via PacI; Sp <sup>R</sup>                                                                                                            |           |
| pTH3372 | fix-2 locus (pSymA nt 408,765-422,417) assembled by yeast recombineering into pTH3369 via PacI; Sp <sup>R</sup>                                                                                               | This work |
| pTH3373 | synth-nif cluster (pSymA nt 445,513-461,184, 482,759-485,097) assembled by yeast recombineering into pTH3370 via PacI; Tc <sup>R</sup>                                                                        | This work |
| pTH3375 | synth-nod (pSymA nt 418,096-422,417, 468,075-475,645, 477,027-482,783, 485,141-492,308) and synth-nif (pSymA nt 445,513-461,184, 482,759-485,097) clusters assembled into pTH3278 via I-SceI; Nm <sup>R</sup> | This work |
| pTH3376 | synth-fix cluster created by assembling fix-2 locus (pSymA nt 412,309-417,593) with fix-1 locus in pTH3278 by yeast recombineering via I-SceI; Nm <sup>R</sup>                                                | This work |
| pTH3396 | fix-2 locus <i>fix</i> genes (pSymA nt 412,309-417,593) assembled into pTH3369 via Pac-I; Sp <sup>R</sup>                                                                                                     | This work |
| pTH3434 | NGR234 <i>nod</i> loci (pNGR234a nt 43,561-51,762; 312,667-316,686; 434,093-444,379; 495,184-497,027; 99,596-101,584) assembled into pTH3369 via PacI; Sp <sup>R</sup>                                        | This work |

\*In all cases Nm<sup>R</sup> refers to Nm<sup>R</sup> (used for selection in *S. meliloti*) and Km<sup>R</sup> (used for selection in *E. coli*)

**Table S3.** Primer sets used for amplification of symbiotic clusters

| Plasmid              | Vector                        |    | Forward Primer                                                                                                   | Reverse Primer                                                                                                                           | pSymA location  |
|----------------------|-------------------------------|----|------------------------------------------------------------------------------------------------------------------|------------------------------------------------------------------------------------------------------------------------------------------|-----------------|
| pTH3278<br>(fix-1)   | pAGE3.0<br>(Cla-I/<br>I-SceI) | 1  | GCTGTAAGTACATCACC<br>GACGAGCAAGGCAAGA<br>CGATCATATAACTTCGT<br>ATAAAGTATCCTATACG<br>AAGTTATCATGCCACCA<br>GTCTAGCG | CGCAGACTTGACGCAG<br>ATC                                                                                                                  | 662,568-667,217 |
|                      |                               | 2  | CGATGTGCACGCTGTTC<br>A                                                                                           | TGACCAACCTGCTAGC<br>GTG                                                                                                                  | 667,177-670,907 |
|                      |                               | 3  | GTGCTTTGGAACCTCGCG<br>A                                                                                          | GCCCAGCGGCGAGGGC<br>AACCAGCTCGACTATA<br>TTACCCTGTTATCCCTA<br>GCGTAACTGAAGTTCCT<br>ATACTTTCTAGAGAATA<br>GGAACCTCGAACGCGA<br>TTTGAATGCAGAA | 670,869-675,117 |
| pTH3294<br>(minSym2) | pTH3278<br>(I-SceI)           | 1  | TCTCTAGAAAGTATAGG<br>AACTTCAGTTACGCTAG<br>GGATAAGCGCGACGAGC<br>GAATTGC                                           | TGGTCGATCCGCGTGTG<br>G                                                                                                                   | 441,274-445,137 |
|                      |                               | 2  | ATCCAGGGGTAGATCTT<br>TACGC                                                                                       | CACCGGGATGCACTAC<br>CG                                                                                                                   | 445,098-449,102 |
|                      |                               | 3  | CACCTCATTGAAATCGT<br>CTGACC                                                                                      | TTTGCACCGTGCGCCT<br>G                                                                                                                    | 449,063-452,931 |
|                      |                               | 4  | AGAAGACAGGTGTCGAT<br>ATCGC                                                                                       | ACTCCCATCAAATTGA<br>GCAGGC                                                                                                               | 452,892-456,881 |
|                      |                               | 5  | GAACAATCGCGAGTTGA<br>AGCG                                                                                        | CAAATATGGATGAGTT<br>CGCGC                                                                                                                | 456,840-460,623 |
|                      |                               | 6  | CAACGATGCGGTCGCAG<br>TG                                                                                          | ATGCCTGAAGTCACTA<br>GGGCCCTTATCTGACT<br>ATCGGAGCG                                                                                        | 460,585-464,352 |
|                      |                               | 7  | CTCCGATAGTCAGATAA<br>AGGCGCTGGATGAAAAG<br>TTCAG                                                                  | GATCATACCGGCCTTG<br>GAGG                                                                                                                 | 465,636-472,075 |
|                      |                               | 8  | AGGCCAGACCAATTACT<br>GCG                                                                                         | ATGGCCGGTAGTGCGG<br>TGATCGCAATGTCCCGC<br>TCGGC                                                                                           | 472,055-474,959 |
|                      |                               | 9  | TCGCCGAGCGGGACATT<br>GCGATCACCGCACTACC<br>GGCC                                                                   | CGCCAGGTACATTGATT<br>GAACG                                                                                                               | 476,839-480,973 |
|                      |                               | 10 | CATAGCTCCGATCCGTT<br>CCG                                                                                         | ATGCACCCGCCATCGG<br>AG                                                                                                                   | 480,955-485,122 |
|                      |                               | 11 | CTGTTTCCTAGGAGTATT<br>CGCG                                                                                       | GCGGAATGTTACCCAT<br>CGGC                                                                                                                 | 485,083-489,130 |
|                      |                               | 12 | TGGTCGTCTACTCTTAG<br>ATCGC                                                                                       | AGCGGCGAGGGCAACC<br>AGCTCGACTATATTACC<br>CTGTTATCCCTAACCGG<br>AAAGGCTCCGGAC                                                              | 489,091-492,522 |
| pTH3372<br>(fix-2)   | pTH3369<br>(Pac-I)            | 1  | GTTTACAAGCATAAAGC<br>TTGCTCAATCAATCACC<br>GGATCCTTAATTAAGCG<br>GAATCTTCTTGCTGTCA                                 | CGCTCCTTCAGTTTCGT<br>C                                                                                                                   | 408,765-413,349 |



|                        |                     |    |                                                                          |                                                                             |                 |
|------------------------|---------------------|----|--------------------------------------------------------------------------|-----------------------------------------------------------------------------|-----------------|
|                        |                     | 2  | GGACTATCTTGGCCTGAC<br>C                                                  | TCAGCCCCATGATCTCG<br>G                                                      | 413,290-418,112 |
|                        |                     | 3  | CAAACGCGCGCAACTC                                                         | CTATAATGACCCCGAA<br>GCAGGGTTATGCAGCG<br>GAAGATTTAATTAAGC<br>TGAAGCGATGAGTCC | 418,071-422,417 |
| pTH3375<br>(minSym3)   | pTH3278<br>(I-SceI) | 1  | TCTCTAGAAAGTATAGG<br>AACTTCAGTTACGCTAG<br>GGATAACGAGATCATGG<br>GGCTGA    | CATGGACGGAAAGGGA<br>CCGATGCCTGAAGTGC<br>TGAAGCGATGAGTCC                     | 418,096-422,417 |
|                        |                     | 2  | CGCCTGCATCGGCGGAC<br>TCATCGCTTCAGCACTTC<br>AGGCATCGGTCC                  | CCTCCTATGGCTCCTGA<br>TG                                                     | 468,075-471,673 |
|                        |                     | 3  | ATGTTCTGAATTGACCGG<br>GC                                                 | CTCACGCTTGAAACA<br>GCGATGAGAAGGCCCT<br>CACTTCTCAGCAAGGC<br>G                | 471,615-475,635 |
|                        |                     | 4  | CCGAGGAGGGCCGCCTT<br>GCTGAGAAGTGAGGGCC<br>TTCTCATCGCTGT                  | GTCCATTGCAGACCAG<br>GAT                                                     | 477,027-480,080 |
|                        |                     | 5  | TTCCGAGAACCATCATC<br>AACG                                                | GAGTATCGCTGGCAGC<br>TTGATGAAGGTGCAAG<br>CGAGGAGTTCTTGATC<br>AAC             | 480,015-482,783 |
|                        |                     | 6  | AACTTGCATGTTGATCA<br>AGAACTCCTCGCTTGCA<br>CCTTCATCAAGCTG                 | TGTCGATCACTACCCCG<br>A                                                      | 485,141-488,760 |
|                        |                     | 7  | TCGCGACCACTACGACT                                                        | TTCCCATCATCGAGCGA<br>CCGTCCGACGTGTGCC<br>AAAC                               | 488,714-492,308 |
|                        |                     | 8  | GCGGTTTGGCACACGTC<br>CGACGGTCGCTCGATGA<br>TG                             | CCGACTGTCAATACGC<br>ATACC                                                   | 443,513-447,635 |
|                        |                     | 9  | ACAGACAGGGCACTAAC<br>TC                                                  | CCAGCGATAATGAGGA<br>GCG                                                     | 447,537-452,213 |
|                        |                     | 10 | TCCTCCCGATCCTCAAC<br>G                                                   | CCGTGCAAGTCGTAC<br>C                                                        | 452,156-456,632 |
|                        |                     | 11 | CTTATAAGCTCTACGAT<br>CCGAAG                                              | AGAAAAGCGAGGAGTT<br>CTTGATCAACATGCCGT<br>TCTACCGTTCTTCTG                    | 456,554-461,184 |
|                        |                     | 12 | GCGTGATCGGACAGAAG<br>AACCGGTAGAACGGCAT<br>GTTGATCAAGAACTCCT              | CCCAGCGGCGAGGGCA<br>ACCAGCTCGACTATATT<br>ACCCTGACTCCTAGGA<br>AACAGATCACG    | 482,759-485,097 |
|                        |                     |    |                                                                          |                                                                             |                 |
| pTH3371<br>(synth-nod) | pTH3369<br>(Pac-I)  | 1  | CAAGCATAAAGCTTGCT<br>CAATCAATCACCGGATC<br>CTTAATTAACGAGATCA<br>TGGGGCTGA | CATGGACGGAAAGGGA<br>CCGATGCCTGAAGTGC<br>TGAAGCGATGAGTCC                     | 418,096-422,417 |
|                        |                     | 2  | CGCCTGCATCGGCGGAC<br>TCATCGCTTCAGCACTTC<br>AGGCATCGGTCC                  | CCTCCTATGGCTCCTGA<br>TG                                                     | 468,075-471,673 |
|                        |                     | 3  | ATGTTCTGAATTGACCGG<br>GC                                                 | CTCACGCTTGAAACA<br>GCGATGAGAAGGCCCT<br>CACTTCTCAGCAAGGC                     | 471,615-475,635 |

|                                    |                               |   |                                                                          |                                                                                        |                             |
|------------------------------------|-------------------------------|---|--------------------------------------------------------------------------|----------------------------------------------------------------------------------------|-----------------------------|
|                                    |                               |   |                                                                          | G                                                                                      |                             |
|                                    |                               | 4 | CCGAGGAGGGCCGCCTT<br>GCTGAGAAGTGAGGGCC<br>TTCTCATCGCTGT                  | GTCCATTGCAGACCAG<br>GAT                                                                | 477,027-480,080             |
|                                    |                               | 5 | TTCCGAGAACCATCATC<br>AACG                                                | GAGTATCGCTGGCAGC<br>TTGATGAAGGTGCAAG<br>CGAGGAGTTCTTGATC<br>AAC                        | 480,015-482,783             |
|                                    |                               | 6 | AACTTGCATGTTGATCA<br>AGAACTCCTCGCTTGCA<br>CCTTCATCAAGCTG                 | TGTCGATCACTACCCCG<br>A                                                                 | 485,141-488,760             |
|                                    |                               | 7 | TCGCGACCACTACGACT                                                        | TAATGACCCCGAAGCA<br>GGGTTATGCAGCGGAA<br>GATTTAATTAATCGGAC<br>GTGTGCCAAAC               | 488,714-492,308             |
|                                    |                               |   |                                                                          |                                                                                        |                             |
| pTH3373<br>(synth-nif)             | pTH3370<br>(Pac-I)            | 1 | GACGCCGATGATTTGAA<br>GCGCACTCAGCGTCTGA<br>TCTTAATTAACGGTCGC<br>TCGATGATG | CCGACTGTCAATACGC<br>ATACC                                                              | 443,513-447,635             |
|                                    |                               | 2 | ACAGACAGGGCACTAAC<br>TC                                                  | CCAGCGATAATGAGGA<br>GCG                                                                | 447,537-452,213             |
|                                    |                               | 3 | TCCTCCCGATCCTCAAC<br>G                                                   | CCGTGCAAGTCGTCAC<br>C                                                                  | 452,156-456,632             |
|                                    |                               | 4 | CTTATAAGCTCTACGAT<br>CCGAAG                                              | AGAAAAGCGAGGAGTT<br>CTTGATCAACATGCCGT<br>TCTACCGGTTCTTCTG                              | 456,554-461,184             |
|                                    |                               | 5 | GCGTGATCGGACAGAAG<br>AACCGGTAGAACGGCAT<br>GTTGATCAAGAACTCCT              | TCGCTATAATGACCCCG<br>AAGCAGGGTTATGCAG<br>CGGAAGATTTAATTAA<br>ACTCCTAGGAAACAGA<br>TCACG | 482,759-485,097             |
|                                    |                               |   |                                                                          |                                                                                        |                             |
| pTH3396<br>(fix-2<br>reduced)      | pTH3369<br>(Pac-I)            | 1 | CTATTCTCTAGAAAGTA<br>TAGGAACCTCAGTTACG<br>CTAGGGGCTTAATGGCG<br>GCTCGTTG  | AGCGGCGAGGGCAACC<br>AGCTCGACTATATTACC<br>CTGTTATCCCTAGATCT<br>CGTATCCGCTACTC           | 412,309-417,593             |
|                                    |                               |   |                                                                          |                                                                                        |                             |
| pTH3376<br>(synth-fix)             | pAGE3.0<br>(Cla-I/<br>I-SceI) | 1 | AGCATAAAGCTTGCTCA<br>ATCAATCACCGGATCCT<br>TAATTAAGCTTAATGGC<br>GGCTCGTTG | CTATAATGACCCCGAA<br>GCAGGGTTATGCAGCG<br>GAAGATGATCTCGTAT<br>CCGCTACTC                  | 412,309-417,593             |
| pTH3398<br>(stachy)                | pTH3370<br>(Pac-I)            | 1 | AGCAGGACCCGATGATT<br>TGAAGCGCACTCAGCGT<br>CTGATCCTCAGTTGATC<br>ACCAGCGG  | AATGACCCCGAAGCAG<br>GGTTATGCAGCGGAAG<br>ATTTAATTAACGCCTCG<br>ATTATGCTGCC               | 402,812-408,115             |
| pTH3434<br>(NGR234<br><i>nod</i> ) | pTH3369<br>(Pac-I)            | 1 | CAAGCATAAAGCTTGCT<br>CAATCAATCACCGGATC<br>CTTAATTAAGAGCCGAC<br>CGTGCAATT | AAGACCTCAGATCGGC<br>CTAC                                                               | 43,561-47,513<br>(pNGR234a) |
|                                    |                               | 2 | GGAAGGTCATGGCGCAA<br>A                                                   | GGCGATCAGGATGAGA<br>CGGCGCCTTAATTATCA<br>GCCACATTGC                                    | 47,466-51,762<br>(pNGR234a) |
|                                    |                               | 3 | ATGTGGCTGATAATTAA                                                        | AAGTTGGATCAAAGAA                                                                       | 312,667-316,686             |

|  |  |   |                                                    |                                                                          |                               |
|--|--|---|----------------------------------------------------|--------------------------------------------------------------------------|-------------------------------|
|  |  |   | GGCGCCGTCTCATCCTG<br>ATCG                          | CAGGGACATACACGTA<br>TCTTGC GCG                                           | (pNGR234a)                    |
|  |  | 4 | GCGCAAGATACGTGTAT<br>GTCCCTGTTCTTTGATCC<br>AACTTCC | TGTGCTCCGACTGAATT<br>TAGT                                                | 434,093-439,036<br>(pNGR234a) |
|  |  | 5 | GCTGTCCTGACCTACGG                                  | ACCAGGGGCACGGATC<br>AACACCTATTTTGTGAG<br>GCTCTGCT                        | 438,968-444,279<br>(pNGR234a) |
|  |  | 6 | GCAGAGCCTCACAAAAT<br>AGGTGTTGATCCGTGCC<br>CCTG     | GACGATTAGTGCATGT<br>ATCCCGGCGCGTCAAA<br>GATCG                            | 495,184-497,027<br>(pNGR234a) |
|  |  | 7 | AGGCGATCTTTGACGCG<br>CCGGGATACATGCACTA<br>ATCGTCAC | TAATGACCCCGAAGCA<br>GGGTTATGCAGCGGAA<br>GATTTAATTAACGCGAT<br>GTCAAGCTCCT | 99,596-101,584<br>(pNGR234a)  |

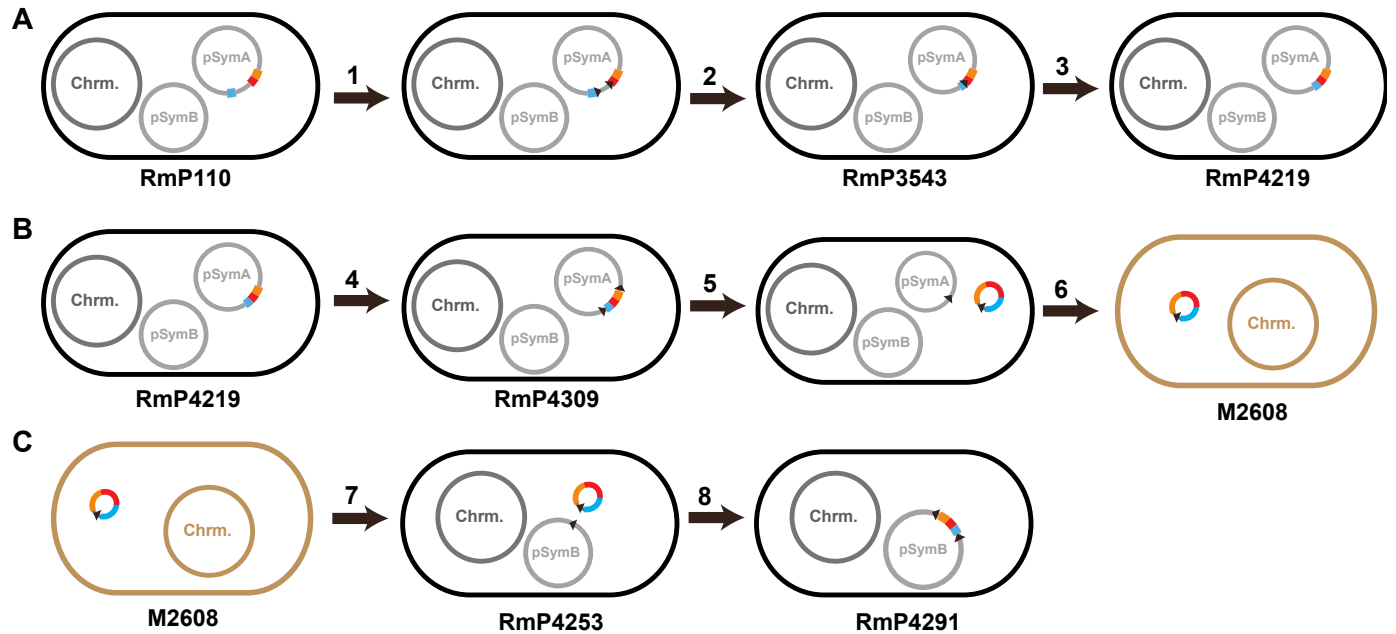

**Figure S1. Schematic of symbiotic region capture and integration into a  $\Delta$ pSymA background.** **A.** Combination of essential regions into a single locus. Three separate regions were brought adjacent to one another by introducing *FRT* sites (black arrowheads) upstream of A121 (blue) and downstream of A118 (red)/A117 (orange) (1), deleting the intervening region by Flp-*FRT* recombination (2), and removing the *FRT* scar between the loci by double homologous recombination (3) to produce RmP4219. **B.** Isolation of A117-A118-A121 by *in vivo* region capture. *FRT* sites inside suicide plasmid backbones were introduced that flanked A117-A118-A121 (4), Flp-*FRT* recombination between *FRT*s excised the region as a plasmid capable of replicating in *E. coli* (5), and this plasmid was captured in *E. coli* by conjugation (6). **C.** Integration of A117-A118-A121 into pSymB to produce minSymA1.0. A117-A118-A121 were introduced to *S. meliloti*  $\Delta$ pSymA as a suicide plasmid by conjugation (7), and integrated into an *FRT* site landing pad (*hypRE::FRT*) in pSymB by Flp-*FRT* recombination (8).

A

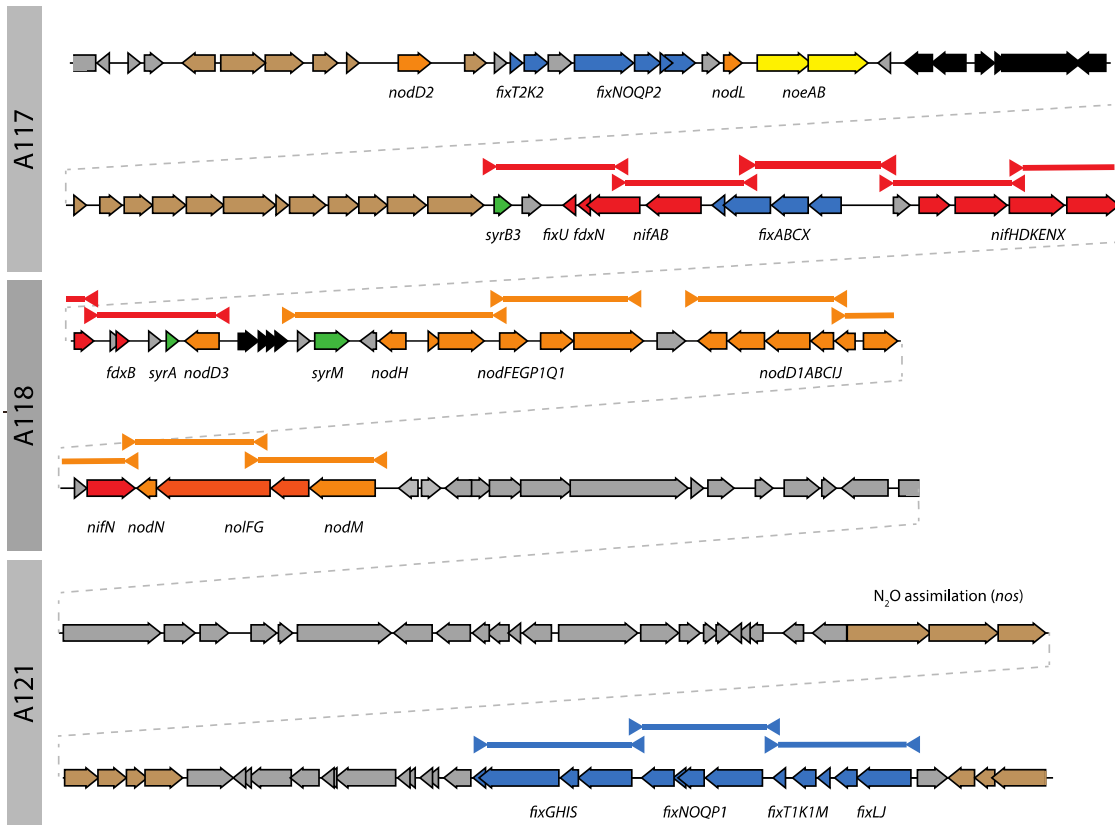

B

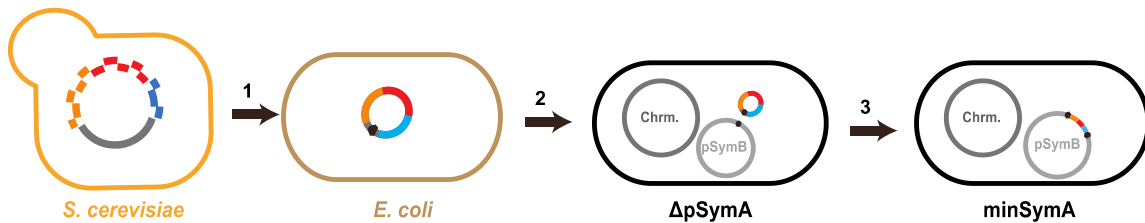

**Figure S2. Schematic for assembly of symbiotic loci by yeast recombineering and integration into  $\Delta pSymA$ .** **A.** Loci of interest were amplified from a plasmid stock of pTH3255 (used to create minSymA1.0) by PCR. Shown are the amplicons used to assemble the symbiotic loci for construction of minSymA2.0. Amplified fragments were transformed with a compatible, linearized vector into *S. cerevisiae*. **B.** A circular plasmid is assembled from PCR amplicons and linearized vector backbone in *S. cerevisiae* by homologous recombination. The plasmid is isolated and introduced to *E. coli* by transformation (1). The suicide plasmid is introduced to *S. meliloti*  $\Delta pSymA$  as a suicide plasmid by conjugation (2) and integrated into an *FRT* site landing pad in pSymB by Flp-*FRT* recombination (3).

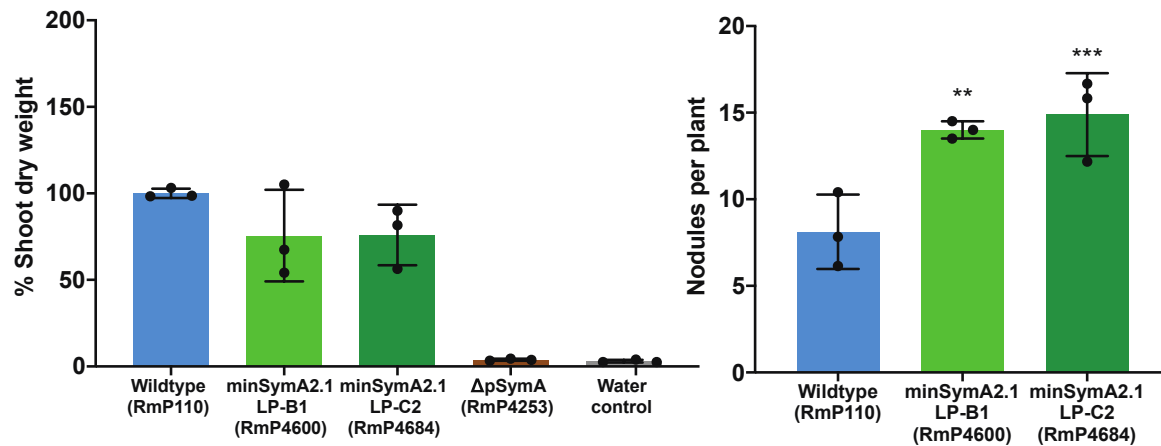

**Figure S3. Genomic location does not influence symbiotic phenotypes.** Shoot dry weight and nodules per plant are indicated for alfalfa inoculated with minSymA2.1 strains, with the minSymA2.0 complement of symbiotic genes integrated into either the LP-B1 (in pSymB) or LP-C2 (in the chromosome) landing pad (measurements from plants 38 days post inoculation). Statistical significance was assessed with one-way ANOVA and Dunnett's multiple comparisons test and is presented compared to wildtype. \*\* =  $P < 0.01$ , \*\*\* =  $P < 0.001$ .

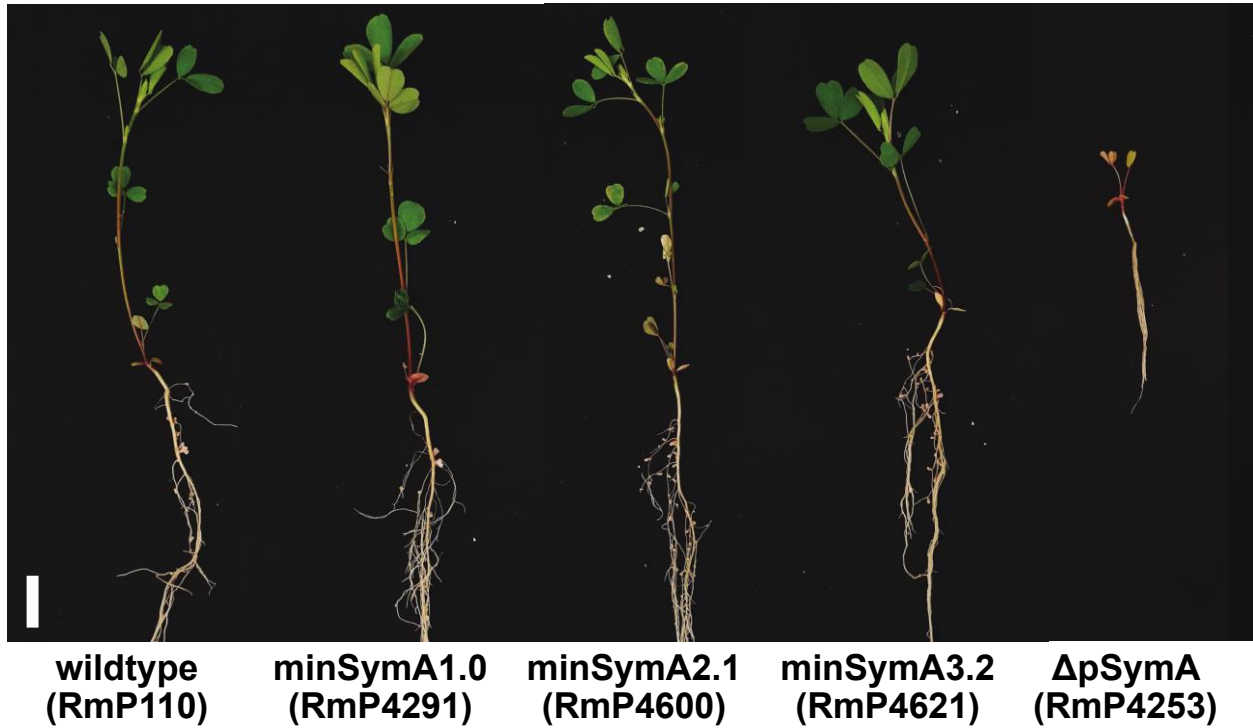

**Figure S4. *Medicago sativa* inoculated with minSymA1.0, minSymA2.1, and minSymA3.2.** Images for representative plants from the three minimal genomes inoculated onto alfalfa with a  $\Delta$ pSymA negative control are presented (31 days post inoculation). Scale bar represents 2 cm.

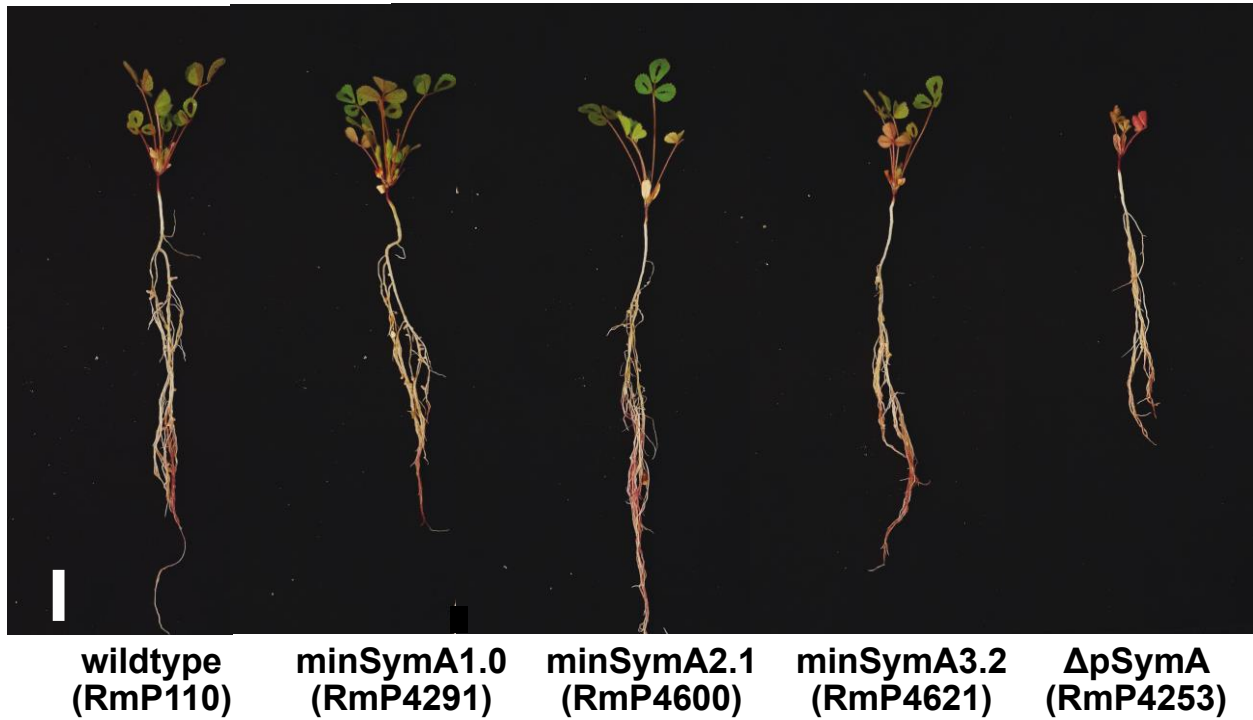

**Figure S5. *Medicago truncatula* inoculated with minSymA1.0, minSymA2.1, and minSymA3.2.** Images for representative plants from the three minimal genomes inoculated onto *M. truncatula* with a ΔpSymA negative control are presented (31 days post inoculation). Scale bar represents 2 cm.



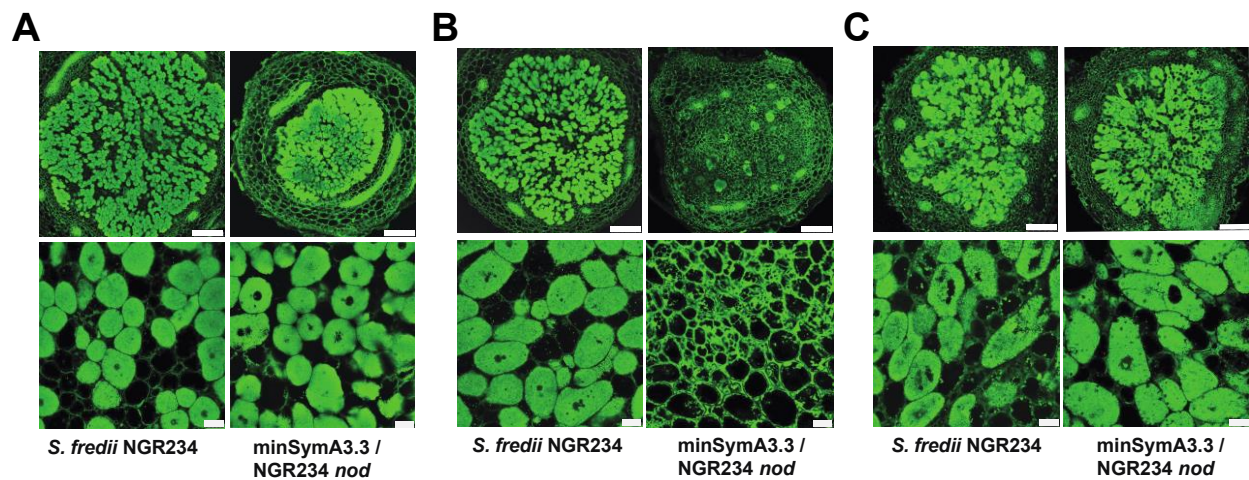

**Figure S6. Confocal microscopy of nodules from *S. fredii* NGR234 hosts plants.**

Representative nodules from *Vigna unguiculata* (A), *Macroptilium aptropurpureum* (B) and *Leucaena leucocephala* (C) inoculated with wildtype *Sinorhizobium fredii* NGR234 or *Sinorhizobium meliloti* minSymA3.3 with the NGR234 *nod* cluster. Top panels show the whole nodule view with scale bar (white) representing 250  $\mu\text{m}$ . The bottom panels provide a higher magnification view of the central portion of the nodules, with the scale bar (white) representing 25  $\mu\text{m}$ .

## SI References

1. H. M. Meade, S. R. Long, G. B. Ruvkun, S. E. Brown, F. M. Ausubel, Physical and genetic characterization of symbiotic and auxotrophic mutants of *Rhizobium meliloti* induced by transposon Tn5 mutagenesis. *J. Bacteriol.* 149, 114–122 (1982).
2. I. J. Oresnik, T. C. Charles, T. M. Finan, Second site mutations specifically suppress the Fix<sup>-</sup> phenotype of *Rhizobium meliloti ndvF* mutations on alfalfa: identification of a conditional *ndvF*-dependent mucoid colony phenotype. *Genetics* 136, 1233–1243 (1994).
3. Z.-C. Yuan, R. Zaheer, T. M. Finan, Regulation and properties of PstSCAB, a high-affinity, high-velocity phosphate transport system of *Sinorhizobium meliloti*. *J. Bacteriol.* 188, 1089–1102 (2006).
4. B. Milunovic, R. A. Morton, T. M. Finan, Cell growth inhibition upon deletion of four toxin-antitoxin loci from the megaplasmids of *Sinorhizobium meliloti*. *J. Bacteriol.* 196, 811–824 (2014).
5. K. Kibitkin, “Transport and metabolism of  $\beta$ -glycosidic sugars in *Sinorhizobium meliloti*,” McMaster University. (2011).
6. C. White, J. M. Gavina, R. Morton, P. Britz-McKibbin, T. M. Finan, Control of hydroxyproline catabolism in *Sinorhizobium meliloti*. *Mol. Microbiol.* 85, 1133–1147 (2012).
7. G. C. diCenzo, M. Zamani, B. Milunovic, T. M. Finan, Genomic resources for identification of the minimal N<sub>2</sub>-fixing symbiotic genome. *Environ. Microbiol.* 18, 2534–2547 (2016).
8. T. M. Finan, B. Kunkel, G. F. de Vos, E. R. Signer, Second symbiotic megaplasmid in *Rhizobium meliloti* carrying exopolysaccharide and thiamine synthesis genes. *J. Bacteriol.* 167, 66–72 (1986).
9. J. Quandt, M. F. Hynes, Versatile suicide vectors which allow direct selection for gene replacement in Gram negative bacteria. *Gene* 127, 15–21 (1993).
10. B. A. Geddes, M. A. Mendoza-Suárez, P. S. Poole, A bacterial expression vector archive (BEVA) for flexible modular assembly of Golden Gate-compatible vectors. *Front. Microbiol.* 9, 3345 (2019).
11. S. L. Brumwell, *et al.*, Designer *Sinorhizobium meliloti* strains and multi-functional vectors enable direct inter-kingdom DNA transfer. *PLoS One* 14, e0206781 (2019).
12. A. Cowie, *et al.*, An integrated approach to functional genomics: construction of a

novel reporter gene fusion library for *Sinorhizobium meliloti*. *Appl. Environ. Microbiol.* 72, 7156–7167 (2006).

13. Y. Zhang, T. Aono, P. Poole, T. M. Finan, NAD(P)<sup>+</sup>-malic enzyme mutants of *Sinorhizobium* sp. strain NGR234, but not *Azorhizobium caulinodans* ORS571, maintain symbiotic N<sub>2</sub> fixation capabilities. *Appl Environ Microbiol* 78, 2803–2812 (2012).
